# Divergence-free interpolation of vector fields from point values – exact $\nabla \cdot \mathbf{B} = 0$ in numerical simulations

Colin P. McNally<sup>1,2</sup>★

<sup>1</sup>*Department of Astrophysics, American Museum of Natural History, New York, NY 10024, USA*

<sup>2</sup>*Department of Astronomy, Columbia University, New York, NY 10027, USA*

Accepted 2011 February 21. Received 2011 February 21; in original form 2011 January 20

## ABSTRACT

In astrophysical magnetohydrodynamics (MHD) and electrodynamic simulations, numerically enforcing the  $\nabla \cdot \mathbf{B} = 0$  constraint on the magnetic field has been difficult. We observe that for point-based discretization, as used in finite-difference type and pseudo-spectral methods, the  $\nabla \cdot \mathbf{B} = 0$  constraint can be satisfied entirely by a choice of interpolation used to define the derivatives of  $\mathbf{B}$ . As an example we demonstrate a new class of finite-difference-type derivative operators on a regular grid which has the  $\nabla \cdot \mathbf{B} = 0$  property. This principle clarifies the nature of  $\nabla \cdot \mathbf{B} \neq 0$  errors. The principles and techniques demonstrated in this Letter are particularly useful for the magnetic field, but can be applied to any vector field. This Letter serves as a brief introduction to the method and demonstrates an implementation showing convergence.

**Key words:** magnetic fields – magnetohydrodynamics (MHD) – methods: numerical.

## 1 INTRODUCTION

As originally laid out by Brackbill & Barnes (1980), failing to obey the  $\nabla \cdot \mathbf{B} = 0$  constraint in magnetohydrodynamics (MHD) may lead to numerical instability and unphysical results. This issue has attracted much attention in computational astrophysics (e.g. Brackbill & Barnes 1980; Balsara & Kim 2004; Price 2010; Dolag & Stasyszyn 2009). To elucidate what  $\nabla \cdot \mathbf{B} = 0$  means, specifying the manner in which  $\mathbf{B}$  is represented is essential. In a numerical method, the vector fields are represented by a discrete set of values. Two classes of discretizations are popular in astrophysical applications, finite-volume and point values. Finite-volume discretizations store the volume average of the field over some cell. These volume averages constrain the possible divergence of a vector field interpolating these values, and hence the Constrained Transport method (Evans & Hawley 1988) can be applied to conserve this divergence throughout the simulation. However, when the magnetic field is represented by point values, the divergence of the interpolated field is not constrained by the point values, so some extra freedom exists. Two classes of approaches have been used. The first class is to admit  $\nabla \cdot \mathbf{B} \neq 0$  errors, and then attempt to manage the consequences. Methods of this type include the eight-wave scheme (Powell 1994; Powell et al. 1999), and diffusion method (Dedner et al. 2002). The Smoothed Particle Hydrodynamics schemes of Price & Monaghan (2004a,b, 2005), Børve, Omang & Trulsen (2001) and Dolag & Stasyszyn (2009) also fall into this class, as the former uses a formulation of the MHD equations which is consistent even in  $\nabla \cdot \mathbf{B} \neq 0$ , and the latter removes the

$\nabla \cdot \mathbf{B} \neq 0$  contributions to the momentum equation. The second class of methods constrains the derivatives of the interpolated field. The projection method, used in finite-difference (Brackbill & Barnes 1980), and pseudo-spectral methods, constructs an interpolation of the magnetic field and then modifies the point values so that with the given interpolation scheme they produce a divergence-free continuous field. It is also possible to store and evolve point values of the magnetic vector potential, interpolate this vector potential, and find a value and derivatives of the magnetic field from this interpolation. This approach is used in the PENCIL code.<sup>1</sup> The vector potential approach always yields a magnetic field which is  $\nabla \cdot \mathbf{B} = 0$ . Some of the disadvantages of this method are that it has the property that more than one vector potential configuration leads to the same magnetic field configuration, boundary conditions may be difficult to arrange and compared to evolving  $\mathbf{B}$  directly an extra level of spatial derivatives needs to be evaluated.

The smoothed particle method (SPH) attempts at MHD are notable in that SPH is a non-polynomial method used for approximating derivatives. In this context, in addition to the aforementioned methods following the strategy of admitting  $\nabla \cdot \mathbf{B} \neq 0$ , a method based on the Euler angles formulation has been proposed by Price & Bate (2007) and Rosswog & Price (2007) which by construction yields  $\nabla \cdot \mathbf{B} = 0$ , but Brandenburg (2010) has observed that this approach is not sufficient for realistic MHD as it severely constrains the allowed magnetic field geometries. Additionally, Price (2010) explored the use of the vector potential strategy in SPH, but found it to be unworkable.

★E-mail: cmcnally@amnh.org

<sup>1</sup><http://pencil-code.googlecode.com/>

In this Letter, we describe a principle that if adhered to allows point-value methods to evolve the magnetic field directly, while maintaining formally  $\nabla \cdot \mathbf{B} = 0$ . Although throughout this Letter we refer to magnetic fields, the principles and methods can apply to any vector field.

## 2 A PRINCIPLE

Since the discrete point values of the magnetic field do not have a defined derivative, the problem of  $\nabla \cdot \mathbf{B} = 0$  lies entirely in the method used to produce the continuous representation of the magnetic field from which derivatives are taken. Thus, to produce a  $\nabla \cdot \mathbf{B} = 0$  method, it is sufficient to define an interpolation (or quasi-interpolation) which is restricted to producing only  $\nabla \cdot \mathbf{B} = 0$  fields. A concrete example of such a method is provided by divergence-free matrix valued radial basis function (RBF) interpolation (Narcowich & Ward 1994; Lowitzsch 2002, 2005). The following two sections of this Letter are devoted to a summary of this technique and its use to construct finite-difference-like operators.

RBF interpolation is an alternate method to polynomial basis interpolation for constructing functions which interpolate some discrete set of values. Instead of using a set of functions with a different polynomial form all mentored at the same place (a Taylor Series), RBF uses shifted versions of a one-parameter function. Further, these functions are shifted to be centred on each interpolating point. For a set of scalar valued samples  $\{\mathbf{x}_j, d_j\}_{j=1}^N$  where  $\mathbf{x}_j$  is the position of each point and  $d_j$  is the value of the scalar field to be interpolated at that point, the RBF interpolant is of the form

$$s(\mathbf{x}) = \sum_{j=1}^N \psi(\|\mathbf{x} - \mathbf{x}_j\|) c_j, \quad (1)$$

where  $s(\mathbf{x})$  is the interpolant,  $\psi$  is an RBF and  $c_j$  are a set of coefficients. These coefficients  $\{c_j\}_{j=1}^N$  are such that

$$s(x_k) = d_k \quad \text{for all } 1 \leq k \leq N. \quad (2)$$

Solving for these coefficients is done by solving the equation  $\mathbf{G}\mathbf{c} = \mathbf{d}$  where the matrix entries  $\mathbf{G}_{i,j} = \Psi(\|\mathbf{x}_i - \mathbf{x}_j\|)$ . The remarkable ability of RBF interpolation is that if  $\psi$  has certain properties, this equation has a unique solution for any set of points  $\{\mathbf{x}_j\}$  in any number of dimensions. The reader is encouraged to refer to Wendland (2005) and Buhmann (2003) for the mathematical details of the theory of RBF interpolation.

Beyond scalar fields, it is possible to construct a RBF interpolation for a vector field such as the magnetic field. If the RBF is chosen appropriately, this interpolation can be constrained to produce  $\nabla \cdot \mathbf{B} = 0$ . Given a set of point values  $\{\mathbf{x}_j, \mathbf{d}_j\}_{j=1}^N$  where  $\mathbf{x}_j$  is the position of each point and  $\mathbf{d}_j$  is the value of the vector field to be interpolated at that point, the interpolation is constructed in the form

$$\mathbf{s}(\mathbf{x}) = \sum_{j=1}^N \mathbf{\Phi}(\|\mathbf{x} - \mathbf{x}_j\|) \mathbf{c}_j \quad (3)$$

where  $\{\mathbf{c}_j\}_{j=1}^N$  are such that

$$\mathbf{s}(\mathbf{x}_k) = \mathbf{d}_k \quad \text{for all } 1 \leq k \leq N. \quad (4)$$

The matrix valued RBF  $\mathbf{\Phi}$  is constructed by

$$\mathbf{\Phi}(\mathbf{x}) = \{\nabla \nabla^T - \nabla^2 \mathbf{I}\} \psi(\mathbf{x}), \quad (5)$$

where  $\psi$  is a scalar-valued RBF and  $\mathbf{I}$  is an identity matrix. If a numerical method is built using this representation for the magnetic fields, then the results will be free of  $\nabla \cdot \mathbf{B} \neq 0$  errors. This use of

a  $\nabla \cdot \mathbf{B} = 0$  interpolation basis is a general principle; it could apply to other classes of basis, and spectral basis.

## 3 DEMONSTRATION

In a manner similar to Taylor-series-based finite-difference stencils, we can build generalized finite-difference stencils using RBF interpolation. The procedure is the same as for Taylor-series-based finite differences; we interpolate the data at a local set of points and then take derivatives of the interpolant. Like with Taylor-series-based finite differences, the resulting scheme will not in general conserve mass, linear momentum or energy to machine precision. These quantities will usually only be conserved to the level of the truncation error of the scheme. One can look to the body of work produced with the PENCIL code, a high-order finite-difference scheme, to see examples of a successful approach based on a non-conservative method (e.g. Johansen et al. 2007; Babkovskaia, Haugen & Brandenburg 2011). Scalar value RBF finite-difference stencils have been studied in Bayona et al. (2010) for the case of the multi-quadric RBF. The RBF finite difference (RBF-FD) approach has also been applied to convection-type partial differential equations in Fornberg & Lehto (2010).

To illustrate this construction, we must choose an RBF, in this case a Gaussian:

$$\psi(r) = e^{-\epsilon r^2}, \quad (6)$$

where  $\epsilon$  is a constant called the scaling factor. The scaling factor can be adjusted depending on the interpolation point distribution. Other RBFs can be used (see Wendland 2005; Buhmann 2003, and recent results on the near equivalence of some common RBFs; Boyd 2010), but the Gaussian gives the simplest algebraic expressions in the following.

To construct a divergence-free matrix valued basis function from  $\psi(r)$ , we apply equation (5) in two dimensions with  $r^2 = x^2 + y^2$ , yielding

$$\begin{aligned} \Phi_{11} &= -(4\epsilon^2 y^2 - 2\epsilon) e^{-\epsilon(x^2+y^2)} \\ \Phi_{12} &= 4\epsilon^2 x y e^{-\epsilon(x^2+y^2)} \\ \Phi_{21} &= \Phi_{12} \\ \Phi_{22} &= -(4\epsilon^2 x^2 - 2\epsilon) e^{-\epsilon(x^2+y^2)}. \end{aligned} \quad (7)$$

The combinations  $(\Phi_{11}, \Phi_{12})$  and  $(\Phi_{21}, \Phi_{22})$  are divergence-free vector fields. Fig. 1 shows the two components. One component resembles a dipole field in the  $x$  direction, and the other a dipole field in the  $y$  direction. In essence the method interpolates only  $\nabla \cdot \mathbf{B} = 0$  fields because the field is built entirely from shifted and normalized versions of these dipole components. To build up an interpolation of some point-sampled field with these as the basis functions, it is necessary to solve the set of linear equations:

$$\mathbf{A}\mathbf{c} = \mathbf{d}. \quad (8)$$

For  $N$  interpolation points the matrix  $\mathbf{A}$  has entries:

$$\mathbf{A}_{1:N,1:N} \rightarrow \mathbf{A}_{i,j} = \Phi_{11}(r_{ij}) \quad (9)$$

$$\mathbf{A}_{N+1:2N,1:N} \rightarrow \mathbf{A}_{i,j} = \Phi_{12}(r_{ij}) \quad (10)$$

$$\mathbf{A}_{1:N,N+1:2N} \rightarrow \mathbf{A}_{i,j} = \Phi_{21}(r_{ij}) \quad (11)$$

$$\mathbf{A}_{N+1:2N,N+1:2N} \rightarrow \mathbf{A}_{i,j} = \Phi_{22}(r_{ij}). \quad (12)$$

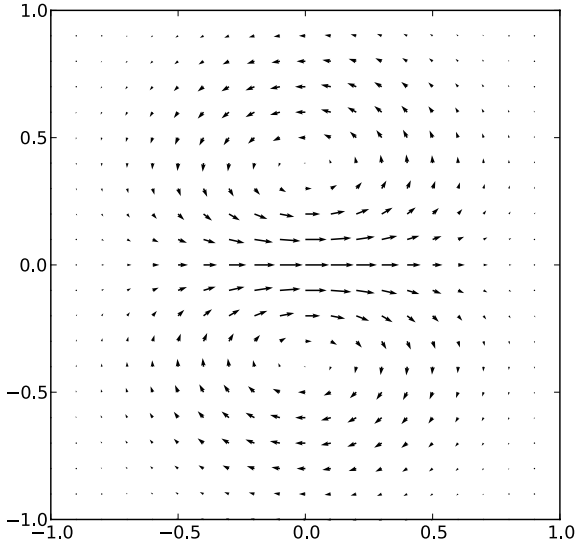

**Figure 1.** The  $x$  vector field component of equation (7) with  $\epsilon = 3.5$ ; the  $y$  component is the same rotated  $90^\circ$ .

Each sub-matrix of  $\mathbf{A}$  has entries corresponding to an entry in  $\Phi$ . The vector  $\mathbf{d}$  has entries:

$$\mathbf{d}_{1:N} \rightarrow \mathbf{d}_i = B_{i,x} - B_{x0} \quad (13)$$

$$\mathbf{d}_{N+1:2N} \rightarrow \mathbf{d}_i = B_{i,y} - B_{y0}. \quad (14)$$

$\mathbf{A}$  is the interpolation matrix, and  $\mathbf{d}$  is the values being interpolated.  $B_{i,x}$  and  $B_{i,y}$  are the components of the vector field being interpolated.  $B_{x0}$  and  $B_{y0}$  are constant background field components, which may be chosen to be the field at the interpolation point where the derivatives are being calculated. This subtraction of the background constant component of the field increases the accuracy of the RBF approximation as this component is not in the space spanned by the interpolation basis. This background component is irrelevant to the  $\nabla \cdot \mathbf{B} = 0$  constraint and to the determination of derivatives. The vector  $\mathbf{c}$  is composed of the interpolation coefficients in equation (3). To find the derivatives of the interpolating function at point  $\mathbf{x}_0$ , we can simply evaluate the derivative of equation (3) as

$$\left. \frac{\partial \mathbf{s}}{\partial x} \right|_{x=\mathbf{x}_0} = \sum_{j=1}^N \left. \frac{\partial \Phi}{\partial x} \right|_{x=\mathbf{x}_0 - \mathbf{x}_j} \mathbf{c}_j, \quad (15)$$

which yields the RBF estimate of the derivative at the point  $\mathbf{x}_0$ . This gives us a method of finding the derivatives of a  $\nabla \cdot \mathbf{B} = 0$  magnetic field from point values. The interpolation points chosen can be arbitrary, but for the purposes of building finite-difference like derivative operators a set of nearest-neighbouring points is a natural choice. In the following, we demonstrate the use of  $3 \times 3$  (nine point) and  $5 \times 5$  (25 point) stencils, centred on  $\mathbf{x}_0$ , in two dimensions to solve the equations of MHD.

The equations solved are those for viscous, resistive, compressible isothermal MHD in two dimensions:

$$\frac{\partial \rho}{\partial t} = -\nabla \cdot (\rho \mathbf{v}) \quad (16)$$

$$\frac{\partial \rho \mathbf{v}}{\partial t} = \mathbf{v} \cdot \nabla (\rho \mathbf{v}) - \nabla P + (\nabla \times \mathbf{B}) \times \mathbf{B} + \nu \nabla^2 (\rho \mathbf{v}) \quad (17)$$

$$\frac{\partial \mathbf{B}}{\partial t} = \nabla \times (\mathbf{v} \times \mathbf{B}) + \eta \nabla^2 \mathbf{B} \quad (18)$$

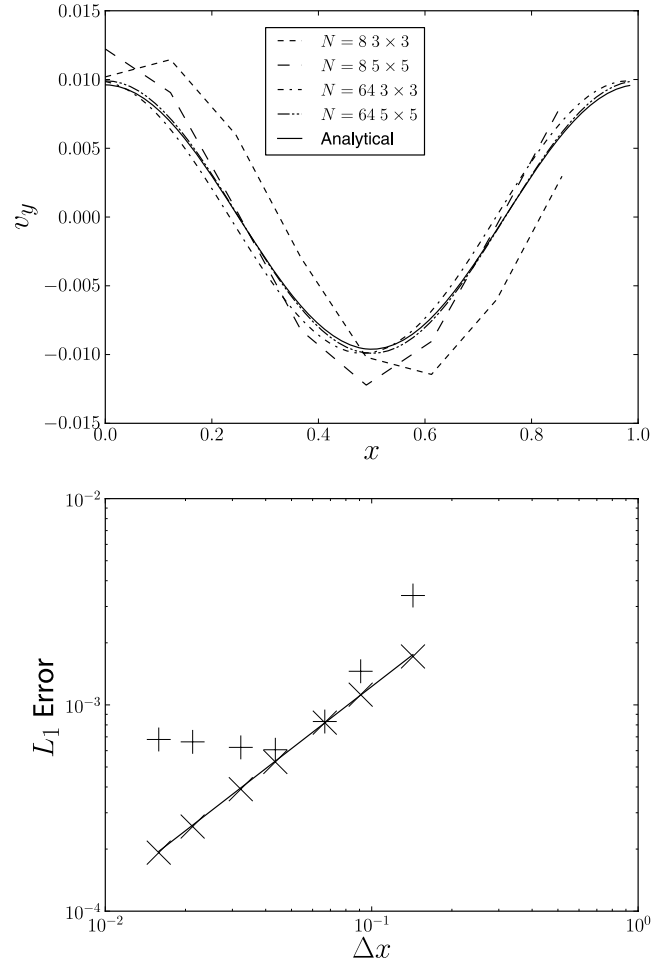

**Figure 2.** Upper: Alfvén wave solutions at two resolutions, grid size  $N \times N$  with  $3 \times 3$  and  $5 \times 5$  point stencils. Lower: convergence of Alfvén wave solution to analytical result. Results from  $3 \times 3$  stencils plotted with + and from  $5 \times 5$  stencils plotted with  $\times$ . The solid line marks a slope of 1. The  $3 \times 3$  stencil error saturates at a larger value than the  $5 \times 5$  stencil error.

with the equation of state  $P = c_s^2 \rho$  where  $\rho$  is the density,  $\mathbf{v}$  is the velocity,  $P$  is pressure,  $\mathbf{B}$  is the magnetic field,  $\nu$  is the dynamic viscosity and  $\eta$  is the magnetic diffusivity. The equations are spatially discretized on an evenly spaced square grid with periodic boundary conditions. Spatial derivatives are estimated using the RBF methods on  $3 \times 3$  stencils as outlined above, and explicit time integration is performed with the forward Euler method. Both the derivatives of the scalar fields ( $\rho$ ,  $P$ , components of  $\mathbf{v}$ ) and the vector field  $\mathbf{B}$  are taken with scalar and vector RBF interpolations. This method is chosen so that the resulting code is as simple as possible to facilitate the reader's understanding. The source code in Python is available on the author's website.<sup>2</sup>

Since the method is  $\nabla \cdot \mathbf{B} = 0$  by construction, we need only to demonstrate that the solution converges as  $\nabla \cdot \mathbf{B} \neq 0$  errors cannot occur. A suitable test is the evolution of a damped Alfvén wave for finite  $\nu$  and  $\eta$ , the analytical solution for which is given in Chandrasekhar (1961) (section 39). The experimental convergence of the numerical solution to the analytical result for an Alfvén wave is shown in Fig. 2 with  $\epsilon = 1/64$ ,  $\nu = \mu = 0.001$ . Note that the error saturates in this test for the  $3 \times 3$  stencil. As the

<sup>2</sup> <http://www.astro.columbia.edu/~colinm/dfi/>

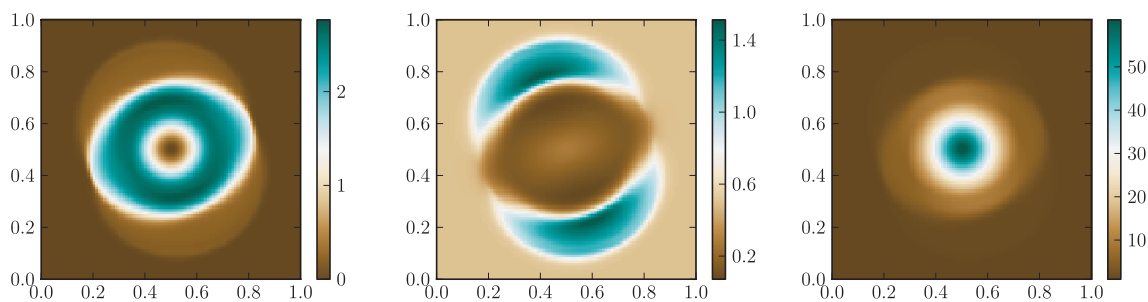

**Figure 3.** Magnetized blast problem. Left: kinetic energy density. Middle: magnetic energy density. Right: mass density.

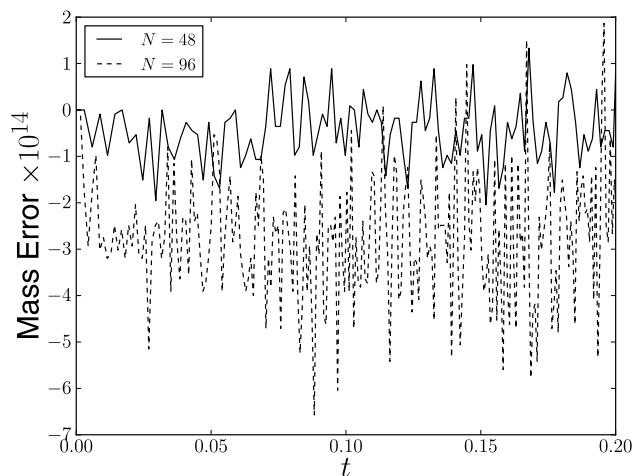

**Figure 4.** Magnetized blast problem total mass error for two grid resolutions  $N = 48$  and  $N = 96$ .

RBF interpolation used does not reproduce a first-order polynomial exactly, the approximation effectively stops improving below some grid spacing. To obtain further convergence, a larger stencil must be used. The  $L_1$  error when the  $5 \times 5$  point stencil is used decays at a rate of 1.0, which is the limit set by the first-order time-integration scheme.

As a further demonstration, the result of a magnetized blast problem, starting for an initial overdensity in the centre of the box, is shown in Fig. 3. The initial condition of this problem is  $v = \eta = 0.005$ ,  $c_s = 0.4082$ ,  $\rho = 99e^{-(x-0.5)^2+(y-0.5)^2/0.12^2} + 1$ ,  $\mathbf{v} = 0$ ,  $B_x = \cos(2\pi/21)$ ,  $B_y = \sin(2\pi/21)$  in an area  $1 \times 1$  with a  $96 \times 96$  grid with periodic boundary conditions. The output is shown at  $t = 0.2$ . The  $3 \times 3$  stencil was used with  $\epsilon = 1/16$ . A similar problem is shown in Stone et al. (2008). We note that the intermediate shock can be seen in the solution on the axis of the blast along the magnetic field (Ferriere, Mac Low & Zweibel 1991). The time history of the absolute error in total mass in the magnetized blast problem is shown in Fig. 4 for two resolutions. The error is at the limit of numerical precision for all resolutions. Evidently the scheme used here is in fact mass-conserving even though it was not explicitly constructed to be so. The error in linear momentum is limited by truncation error. Fig. 5 shows the time evolution of the absolute momentum error for two resolutions. Table 1 lists the momentum errors at  $t = 0.2$  in the blast problem for four grid resolutions  $N$ . The momentum error can be seen to converge towards zero as the resolution is increased. Energy conservation errors are not treated as the discussion is limited to isothermal MHD.

The stability of this scheme is not explored here as the method is presented only as a demonstration of the use of these RBF-

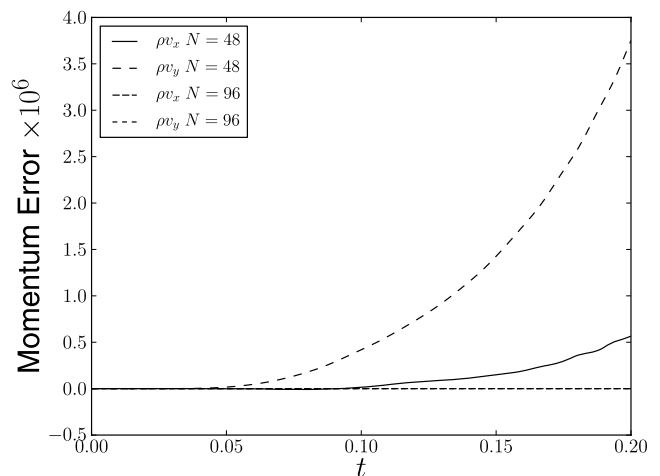

**Figure 5.** Magnetized blast problem momentum errors for two grid resolutions  $N = 48$  and  $N = 96$ .

**Table 1.** Linear momentum errors in the magnetized blast problem.

| Error      | $N = 32$             | $N = 48$             | $N = 64$             | $N = 96$              |
|------------|----------------------|----------------------|----------------------|-----------------------|
| $\rho v_x$ | $5.6 \times 10^{-6}$ | $5.7 \times 10^{-7}$ | $1.2 \times 10^{-8}$ | $1.5 \times 10^{-12}$ |
| $\rho v_y$ | $1.5 \times 10^{-4}$ | $3.8 \times 10^{-6}$ | $5.9 \times 10^{-8}$ | $3.0 \times 10^{-17}$ |

based derivative operators. The computational cost of a RBF-based finite-difference scheme for a derivative is the same as that for a polynomial-based scheme with the same number of stencil points, as the only difference is in the stencil coefficients. However, with RBF-based schemes the well-motivated stencils may not be of the same shape and size as for polynomial-based finite differences – for example the square  $3 \times 3$  stencil used here is not a popular choice when used with polynomial-based schemes. In contrast to the most directly comparable polynomial-based finite-difference scheme yielding  $\nabla \cdot \mathbf{B} = 0$  (the vector potential method), the RBF-based approach has the advantage of requiring fewer derivative stencils to be computed as the magnetic field is obtained directly and not computed from derivatives of the vector potential.

#### 4 EXTENSIONS

The method for constructing RBF-based derivative approximations has no dependence on regularly placed points or the existence of mesh edges. Hence, these methods are easily used in a mesh-free context. Also, though in RBF interpolation theory the interpolation points are chosen to be the RBF centres, in practice the approximation matrix can still be inverted if the interpolation points do

not coincide with the RBF centres. Furthermore, fewer RBFs can be used than interpolation points are specified – in this case a  $\nabla \cdot \mathbf{B} = 0$  least-squares approximation can be computed. The divergence-free basis used as an example in this work is not orthonormal. If an orthonormal basis were specified, it would be possible to perform divergence-free pseudo-spectral simulations with  $\mathbf{B}$ , which may be of particular use in general relativistic MHD and force-free electrodynamics simulations.

Other constraints beyond divergence-free can be placed on the vector field. For example, Lowitzsch (2005) observed that  $\nabla \times \mathbf{B} = 0$  type vector fields can be interpolated in a similar manner shown here. This suggests the possibility to satisfy more complicated, though homogeneous, constraints.

## 5 CONCLUSION

In a point-value method,  $\nabla \cdot \mathbf{B} = 0$  can be satisfied by the correct choice of interpolation scheme. Matrix-valued RBFs provide such an interpolations scheme. Finite-difference-like  $\nabla \cdot \mathbf{B} = 0$  derivative operators can be constructed from matrix-valued RBF interpolations, and their use in the solution of MHD problems has been demonstrated. Further exploration of the stability properties, accuracy and computational cost of schemes based on these operators is warranted. The underlying principle of the choice of a  $\nabla \cdot \mathbf{B} = 0$  interpolation also applies to pseudo-spectral methods, and in general can be applied to any vector field where such a constraint is required.

## ACKNOWLEDGMENTS

We acknowledge useful discussions with M.-M. Mac Low, J. Maron for discussions on the nature of  $\nabla \cdot \mathbf{B} = 0$ , and M.-M. Mac Low for advice on the manuscript. CPM was supported by NSF CDI grant AST08-35734.

## REFERENCES

Babkovskaia N., Haugen N. E. L., Brandenburg A., 2011, *J. Comput. Phys.*, 230, 1  
 Balsara D. S., Kim J., 2004, *ApJ*, 602, 1079

Bayona V., Moscoso M., Carretero M., Kindelan M., 2010, *J. Comput. Phys.*, 229, 8281  
 Børve S., Omang M., Trulsen J., 2001, *ApJ*, 561, 82  
 Boyd J. P., 2010, *J. Comput. Phys.*, 229, 1131  
 Brackbill J. U., Barnes D. C., 1980, *J. Comput. Phys.*, 35, 426  
 Brandenburg A., 2010, *MNRAS*, 401, 347  
 Buhmann M. D., 2003, *Radial Basis Functions*. Cambridge Univ. Press, Cambridge  
 Chandrasekhar S., 1961, *Hydrodynamic and Hydromagnetic Stability*. Oxford Univ. Press, Oxford  
 Dedner A., Kemm F., Kroner D., Munz C., Schnitzer T., Wesenberg M., 2002, *J. Comput. Phys.*, 175, 645  
 Dolag K., Stasyszyn F., 2009, *MNRAS*, 398, 1678  
 Evans C. R., Hawley J. F., 1988, *ApJ*, 332, 659  
 Ferriere K. M., Mac Low M., Zweibel E. G., 1991, *ApJ*, 375, 239  
 Fornberg B., Lehto E., 2011, *J. Comput. Phys.*, 230, 2270  
 Johansen A., Oishi J. S., Mac Low M., Klahr H., Henning T., Youdin A., 2007, *Nat*, 448, 1022  
 Lowitzsch S., 2002, PhD thesis, Texas A&M University  
 Lowitzsch S., 2005, *J. Approximation Theor.*, 137, 238  
 Narcowich F., Ward J., 1994, *Math. Comput.*, 63, 661  
 Powell K. G., 1994, *Approximate Riemann Solver for Magnetohydrodynamics (that Works in More than One Dimension)*. Tech. Rep. ICASE Report No. 94-24, Institute for Computer Applications in Engineering and Science, NASA Langley Research Center  
 Powell K. G., Roe P. L., Linde T. J., Gombosi T. I., de Zeeuw D. L., 1999, *J. Comput. Phys.*, 154, 284  
 Price D. J., 2010, *MNRAS*, 401, 1475  
 Price D. J., Bate M. R., 2007, *MNRAS*, 377, 77  
 Price D. J., Monaghan J. J., 2004a, *MNRAS*, 348, 123  
 Price D. J., Monaghan J. J., 2004b, *MNRAS*, 348, 139  
 Price D. J., Monaghan J. J., 2005, *MNRAS*, 364, 384  
 Rosswog S., Price D., 2007, *MNRAS*, 379, 915  
 Stone J. M., Gardiner T. A., Teuben P., Hawley J. F., Simon J. B., 2008, *ApJS*, 178, 137  
 Wendland H., 2005, *Scattered Data Approximation*. Cambridge Univ. Press, Cambridge

This paper has been typeset from a  $\text{\TeX}/\text{\LaTeX}$  file prepared by the author.
